# Supplementary material for: Bio-inspired antireflective hetero-nanojunctions with enhanced photoactivity
Source: Royal Society of Chemistry journal article supplement (doi:10.1039/c3nr04011a), 2013-01-01
Supplement: c3nr04011a.pdf [file c3nr04011a.pdf]

## Supporting Information

# Bio-inspired Antireflective Hetero-nanojunctions with Enhanced Photoactivity

*Dianpeng Qi, Liyan Zheng, Xuebo Cao, Yueyue Jiang, Hongbo Xu, Yanyan Zhang, Bingjie Yang,  
Yinghui Sun, Huey Hoon Hng, Nan Lu,\* Lifeng Chi,\* and Xiaodong Chen\**

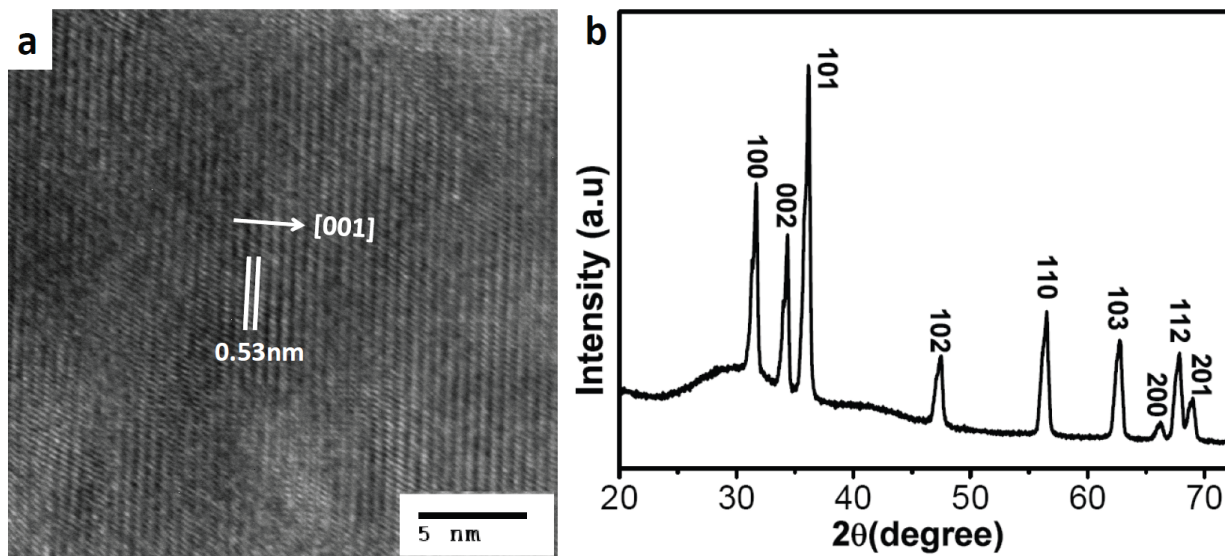

**Figure S1.** (a) HRTEM image of a ZnO nanorod, and (f) XRD pattern of ZnO nanorod.

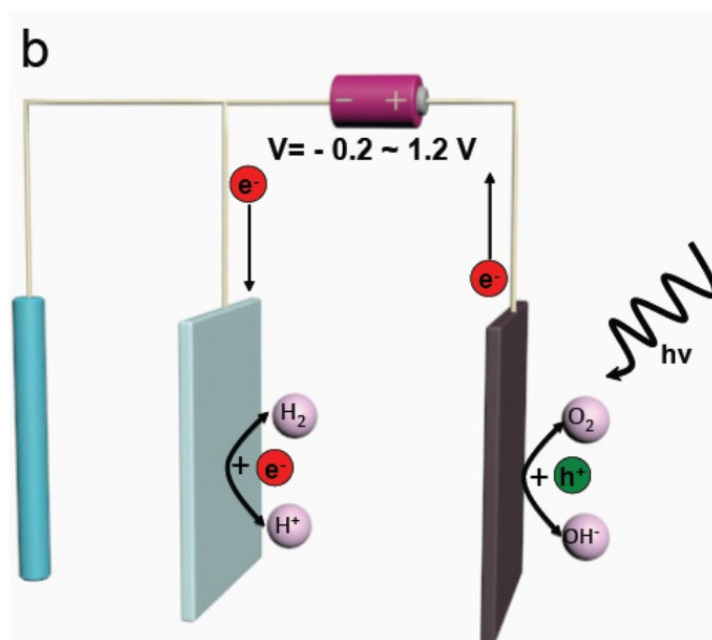

**Figure S2.** Schematic representation of the photoanode behavior in the three-electrode system.

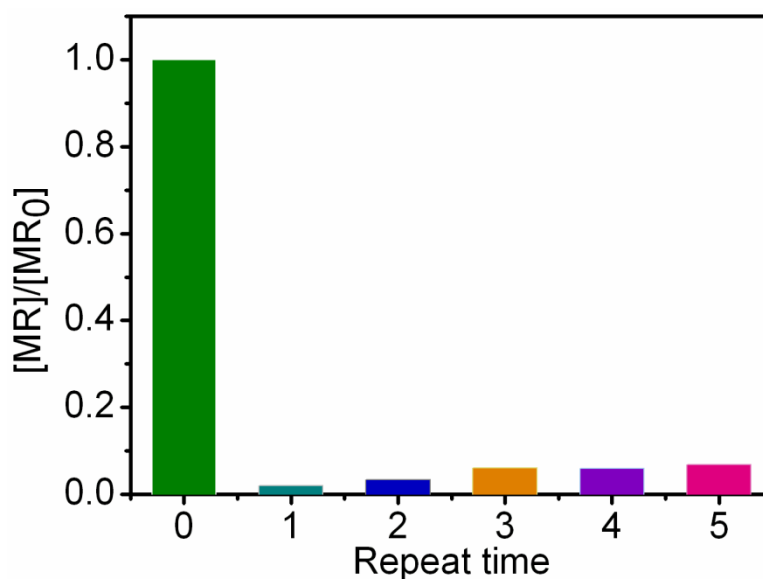

**Figure S3.** The concentration change of rhodamine 6G in the photodegradation process by repeated many times.
